# Supplementary material for: A Retrospective Claims Database Study on Drug Utilization in Japanese Patients with Crohn’s Disease Treated with Adalimumab or Infliximab
Source: PubMed Central journal article supplement — Adv Ther. 2016 Sep 23;33(11):1947–63. doi: 10.1007/s12325-016-0406-6 (PMC5083770; doi:10.1007/s12325-016-0406-6), 2016-09-23
Supplement: 12325_2016_406_MOESM1_ESM.pdf [file 12325_2016_406_MOESM1_ESM.pdf]

## SUPPLEMENTARY MATERIAL

Figure S 1: Patient selection flowchart

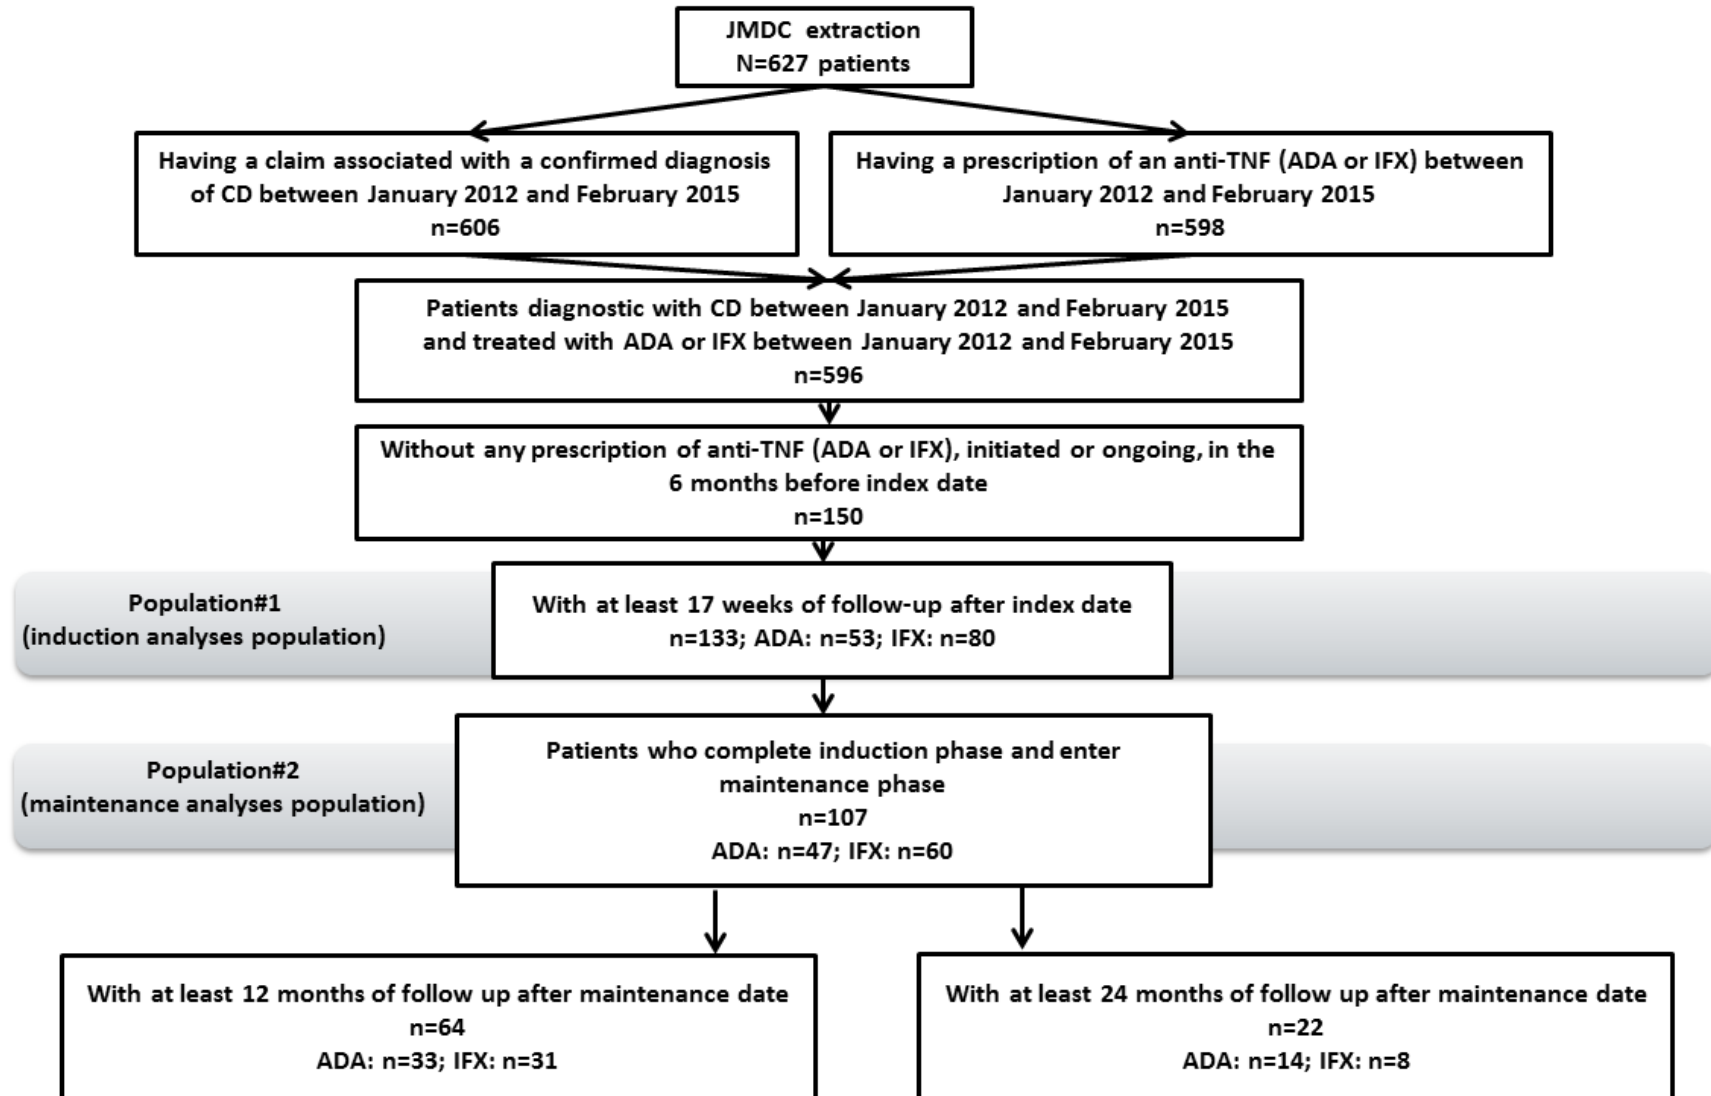

**Table S 1: Persistence over 12 and 24 months after maintenance date**

|                                                     | At least 12 months of follow-up after maintenance date |                |                 |          | At least 24 months of follow-up after maintenance date |                 |                 |          |
|-----------------------------------------------------|--------------------------------------------------------|----------------|-----------------|----------|--------------------------------------------------------|-----------------|-----------------|----------|
|                                                     | IFX<br>(n=31)                                          | ADA<br>(n=33)  | Total<br>(n=64) | p-value* | IFX<br>(n=8)                                           | ADA<br>(n=14)   | Total<br>(n=22) | p-value* |
| <b>Discontinuation</b>                              |                                                        |                |                 |          |                                                        |                 |                 |          |
| <b>No</b>                                           | 26 (83.9%)                                             | 31 (93.9%)     | 57 (89.1%)      | p = 0.25 | 6 (75.0%)                                              | 12 (85.7%)      | 18 (81.8%)      | p = 0.60 |
| <b>Yes</b>                                          | 5 (16.1%)                                              | 2 (6.1%)       | 7 (10.9%)       |          | 2 (25.0%)                                              | 2 (14.3%)       | 4 (18.2%)       |          |
| <b>Time to discontinuation** (months)</b>           |                                                        |                |                 |          |                                                        |                 |                 |          |
| <b>Mean (Sd)</b>                                    | 6.3 (4.9)                                              | 3.5 (3.0)      | 5.5 (4.4)       | p = 0.44 | 6.6 (6.1)                                              | 13.9 (11.7)     | 10.3 (8.7)      | p = 0.44 |
| <b>95% CI</b>                                       | [0.3 ; 12.3]                                           | [-23.4 ; 30.3] | [1.5 ; 9.5]     |          | [-48.0 ; 61.3]                                         | [-91.6 ; 119.3] | [-3.6 ; 24.1]   |          |
| <b>Min-Max</b>                                      | [0.0 ; 10.9]                                           | [1.3 ; 5.6]    | [0.0 ; 10.9]    |          | [2.3 ; 10.9]                                           | [5.6 ; 22.2]    | [2.3 ; 22.2]    |          |
| <b>Median</b>                                       | 8.4                                                    | 3.5            | 5.6             |          | 6.6                                                    | 13.9            | 8.3             |          |
| <b>Q1-Q3</b>                                        | [2.3 ; 9.9]                                            | [1.3 ; 5.6]    | [1.3 ; 9.9]     |          | [2.3 ; 10.9]                                           | [5.6 ; 22.2]    | [4.0 ; 16.6]    |          |
| <b>Switch</b>                                       |                                                        |                |                 |          |                                                        |                 |                 |          |
| <b>No</b>                                           | 28 (90.3%)                                             | 30 (90.9%)     | 58 (90.6%)      | p = 1.00 | 7 (87.5%)                                              | 9 (64.3%)       | 16 (72.7%)      | p = 0.35 |
| <b>Yes</b>                                          | 3 (9.7%)                                               | 3 (9.1%)       | 6 (9.4%)        |          | 1 (12.5%)                                              | 5 (35.7%)       | 6 (27.3%)       |          |
| <b>Time to switch** (months)</b>                    |                                                        |                |                 |          |                                                        |                 |                 |          |
| <b>Mean (Sd)</b>                                    | 8.3 (4.8)                                              | 9.1 (2.1)      | 8.7 (3.4)       | p = 0.83 | 11.7 (--)                                              | 13.0 (6.6)      | 12.8 (5.9)      | p = 0.77 |
| <b>95% CI</b>                                       | [-3.7 ; 20.3]                                          | [3.7 ; 14.4]   | [5.2 ; 12.2]    |          | -                                                      | [4.8 ; 21.2]    | [6.6 ; 19.0]    |          |
| <b>Min-Max</b>                                      | [2.8 ; 11.7]                                           | [6.6 ; 10.5]   | [2.8 ; 11.7]    |          | [11.7 ; 11.7]                                          | [6.6 ; 23.8]    | [6.6 ; 23.8]    |          |
| <b>Median</b>                                       | 10.5                                                   | 10             | 10.3            |          | 11.7                                                   | 10.5            | 11.1            |          |
| <b>Q1-Q3</b>                                        | [2.8 ; 11.7]                                           | [6.6 ; 10.5]   | [6.6 ; 10.5]    |          | [11.7 ; 11.7]                                          | [10.0 ; 13.9]   | [10.0 ; 13.9]   |          |
| <b>Persistence</b>                                  |                                                        |                |                 |          |                                                        |                 |                 |          |
| <b>No</b>                                           | 8 (25.8%)                                              | 5 (15.2%)      | 13 (20.3%)      | p = 0.29 | 3 (37.5%)                                              | 7 (50.0%)       | 10 (45.5%)      | p = 0.67 |
| <b>Yes</b>                                          | 23 (74.2%)                                             | 28 (84.9%)     | 51 (79.7%)      |          | 5 (62.5%)                                              | 7 (50.0%)       | 12 (54.6%)      |          |
| <b>Time to discontinuation or switch** (months)</b> |                                                        |                |                 |          |                                                        |                 |                 |          |
| <b>Mean (Sd)</b>                                    | 7.1 (4.6)                                              | 6.8 (3.7)      | 7.0 (4.1)       | p = 0.77 | 8.3 (5.2)                                              | 13.2 (7.2)      | 11.7 (6.8)      | p = 0.57 |
| <b>95% CI</b>                                       | [3.2 ; 10.9]                                           | [2.2 ; 11.5]   | [4.5 ; 9.5]     |          | [-4.6 ; 21.2]                                          | [6.6 ; 19.9]    | [6.9 ; 16.6]    |          |
| <b>Min-Max</b>                                      | [0.0 ; 11.7]                                           | [1.3 ; 10.5]   | [0.0 ; 11.7]    |          | [2.3 ; 11.7]                                           | [5.6 ; 23.8]    | [2.3 ; 23.8]    |          |
| <b>Median</b>                                       | 9.1                                                    | 6.6            | 8.4             |          | 10.9                                                   | 10.5            | 10.7            |          |
| <b>Q1-Q3</b>                                        | [2.6 ; 10.7]                                           | [5.6 ; 10.0]   | [2.8 ; 10.5]    |          | [2.3 ; 11.7]                                           | [6.6 ; 22.2]    | [6.6 ; 13.9]    |          |

\* Continuous variables were compared using the student test or the Wilcoxon test, categorical variables were compared using the chi-square test or the Fisher's exact test \*\* only patients with at least 1 event  
 ADA= adalimumab; IFX=infliximab

**Table S 2: Dose escalation over 12 and 24 months after maintenance date**

|                                                          | At least 12 months of follow-up after maintenance date |               |                 |           | At least 24 months of follow-up after maintenance date |                |                 |          |
|----------------------------------------------------------|--------------------------------------------------------|---------------|-----------------|-----------|--------------------------------------------------------|----------------|-----------------|----------|
| All patients                                             | IFX<br>(n=31)                                          | ADA<br>(n=33) | Total<br>(n=64) | p-value*  | IFX<br>(n=8)                                           | ADA<br>(n=14)  | Total<br>(n=22) | p-value* |
| <b>Dose escalation</b>                                   |                                                        |               |                 |           |                                                        |                |                 |          |
| No                                                       | 24 (77.4%)                                             | 32 (97.0%)    | 56 (87.5%)      | p = 0.02  | 6 (75.0%)                                              | 12 (85.7%)     | 18 (81.8%)      | p = 0.60 |
| Yes                                                      | 7 (22.6%)                                              | 1 (3.0%)      | 8 (12.5%)       |           | 2 (25.0%)                                              | 2 (14.3%)      | 4 (18.2%)       |          |
| <b>Time to dose escalation (months)***</b>               |                                                        |               |                 |           |                                                        |                |                 |          |
| Mean (Sd)                                                | 6.7 (2.4)                                              | 9.2 (--)      | 7.0 (2.4)       | p = 0.27  | 11.3 (5.4)                                             | 11.2 (2.9)     | 11.2 (3.5)      | p = 1.00 |
| 95% CI                                                   | [4.5 ; 8.9]                                            | -             | [5.0 ; 9.0]     |           | [-36.8 ; 59.3]                                         | [-14.6 ; 37.1] | [5.7 ; 16.8]    |          |
| Min-Max                                                  | [3.6 ; 9.8]                                            | [9.2 ; 9.2]   | [3.6 ; 9.8]     |           | [7.5 ; 15.0]                                           | [9.2 ; 13.3]   | [7.5 ; 15.0]    |          |
| Median                                                   | 7.5                                                    | 9.2           | 7.5             |           | 11.3                                                   | 11.2           | 11.2            |          |
| Q1-Q3                                                    | [3.7 ; 8.8]                                            | [9.2 ; 9.2]   | [4.9 ; 9.0]     |           | [7.5 ; 15.0]                                           | [9.2 ; 13.3]   | [8.3 ; 14.2]    |          |
| Patients without immunosuppressants after the index date | IFX<br>(n=24)                                          | ADA<br>(n=21) | Total<br>(n=45) | p-value*  | IFX<br>(n=7)                                           | ADA<br>(n=4)   | Total<br>(n=11) | p-value* |
| <b>Dose escalation</b>                                   |                                                        |               |                 |           |                                                        |                |                 |          |
| No                                                       | 22 (91.7%)                                             | 20 (95.2%)    | 42 (93.3%)      | p = 1.00  | 6 (85.7%)                                              | 3 (75.0%)      | 9 (81.8%)       | p = 1.00 |
| Yes                                                      | 2 (8.3%)                                               | 1 (4.8%)      | 3 (6.7%)        |           | 1 (14.3%)                                              | 1 (25.0%)      | 2 (18.2%)       |          |
| <b>Time to dose escalation (months)***</b>               |                                                        |               |                 |           |                                                        |                |                 |          |
| Mean (Sd)                                                | 8.7 (1.7)                                              | 9.2 (--)      | 8.8 (1.2)       | p = 1.00  | 15.0 (--)                                              | 9.2 (--)       | 12.1 (4.1)      | p = NA   |
| 95% CI                                                   | [-6.4 ; 23.7]                                          | -             | [5.8 ; 11.9]    |           | -                                                      | -              | [-24.9 ; 49.2]  |          |
| Min-Max                                                  | [7.5 ; 9.8]                                            | [9.2 ; 9.2]   | [7.5 ; 9.8]     |           | [15.0 ; 15.0]                                          | [9.2 ; 9.2]    | [9.2 ; 15.0]    |          |
| Median                                                   | 8.7                                                    | 9.2           | 9.2             |           | 15                                                     | 9.2            | 12.1            |          |
| Q1-Q3                                                    | [7.5 ; 9.8]                                            | [9.2 ; 9.2]   | [7.5 ; 9.8]     |           | [15.0 ; 15.0]                                          | [9.2 ; 9.2]    | [9.2 ; 15.0]    |          |
| Patients with immunosuppressants after the index date    | IFX<br>(n=7)                                           | ADA<br>(n=12) | Total<br>(n=19) | p-value*  | IFX<br>(n=1)                                           | ADA<br>(n=10)  | Total<br>(n=11) | p-value* |
| <b>Dose escalation</b>                                   |                                                        |               |                 |           |                                                        |                |                 |          |
| No                                                       | 2 (28.6%)                                              | 12 (100.0%)   | 14 (73.7%)      | p = 0.002 | 0                                                      | 9 (90.0%)      | 9 (81.8%)       | p = 0.18 |
| Yes                                                      | 5 (71.4%)                                              | 0             | 5 (26.3%)       |           | 1 (100.0%)                                             | 1 (10.0%)      | 2 (18.2%)       |          |
| <b>Time to dose escalation (months)***</b>               |                                                        |               |                 |           |                                                        |                |                 |          |
| Mean (Sd)                                                | 5.9 (2.3)                                              | -             | 5.9 (2.3)       | p = 0.04  | 7.5 (--)                                               | 13.3 (--)      | 10.4 (4.1)      | p = NA   |
| 95% CI                                                   | [3.1 ; 8.8]                                            | -             | [3.1 ; 8.8]     |           | -                                                      | -              | [-26.5 ; 47.2]  |          |
| Min-Max                                                  | [3.6 ; 8.8]                                            | -             | [3.6 ; 8.8]     |           | [7.5 ; 7.5]                                            | [13.3 ; 13.3]  | [7.5 ; 13.3]    |          |
| Median                                                   | 6.1                                                    | -             | 6.1             |           | 7.5                                                    | 13.3           | 10.4            |          |
| Q1-Q3                                                    | [3.7 ; 7.5]                                            | -             | [3.7 ; 7.5]     |           | [7.5 ; 7.5]                                            | [13.3 ; 13.3]  | [7.5 ; 13.3]    |          |

\* Continuous variables were compared using the student test or the Wilcoxon test, categorical variables were compared using the chi-square test or the Fisher's exact test \*\* only patients with at least 1 event; ADA= adalimumab; IFX=infliximab

**Table S 3: Exploratory outcomes over 12 and 24 months after maintenance date**

|                                                      | At least 12 months of follow-up after index date |               |                 |          | At least 24 months of follow-up after index date |               |                 |          |
|------------------------------------------------------|--------------------------------------------------|---------------|-----------------|----------|--------------------------------------------------|---------------|-----------------|----------|
|                                                      | IFX<br>(n=49)                                    | ADA<br>(n=37) | Total<br>(n=86) | p-value* | IFX<br>(n=24)                                    | ADA<br>(n=16) | Total<br>(n=40) | p-value* |
| <b>Surgery</b>                                       |                                                  |               |                 |          |                                                  |               |                 |          |
| <b>No</b>                                            | 42 (85.7%)                                       | 30 (81.1%)    | 72 (83.7%)      | p = 0.56 | 20 (83.3%)                                       | 12 (75.0%)    | 32 (80.0%)      | p = 0.69 |
| <b>Yes</b>                                           | 7 (14.3%)                                        | 7 (18.9%)     | 14 (16.3%)      |          | 4 (16.7%)                                        | 4 (25.0%)     | 8 (20.0%)       |          |
| <b>Time to surgery (months)**</b>                    |                                                  |               |                 |          |                                                  |               |                 |          |
| <b>Mean (Sd)</b>                                     | 4.0 (3.7)                                        | 4.5 (3.7)     | 4.2 (3.5)       | p = 0.75 | 3.6 (3.3)                                        | 15.6 (7.5)    | 9.6 (8.4)       | p = 0.04 |
| <b>95% CI</b>                                        | [0.5 ; 7.4]                                      | [1.1 ; 7.9]   | [2.2 ; 6.3]     |          | [-1.7 ; 8.8]                                     | [3.6 ; 27.6]  | [2.6 ; 16.6]    |          |
| <b>Min-Max</b>                                       | [0.0 ; 9.7]                                      | [0.6 ; 10.5]  | [0.0 ; 10.5]    |          | [0.5 ; 8.2]                                      | [7.9 ; 23.5]  | [0.5 ; 23.5]    |          |
| <b>Median</b>                                        | 3.3                                              | 3             | 3.2             |          | 2.7                                              | 15.5          | 8.1             |          |
| <b>Q1-Q3</b>                                         | [0.5 ; 8.2]                                      | [1.4 ; 7.9]   | [1.4 ; 7.9]     |          | [1.3 ; 5.8]                                      | [9.2 ; 22.0]  | [2.7 ; 15.5]    |          |
| <b>Leukocyte removal therapy</b>                     |                                                  |               |                 |          |                                                  |               |                 |          |
| <b>No</b>                                            | 47 (95.9%)                                       | 37 (100.0%)   | 84 (97.7%)      | p = 0.50 | 24 (100.0%)                                      | 16 (100.0%)   | 40 (100.0%)     | p = 0.88 |
| <b>Yes</b>                                           | 2 (4.1%)                                         | 0             | 2 (2.3%)        |          | 0                                                | 0             | 0               |          |
| <b>Time to leukocyte removal therapy (months)**</b>  |                                                  |               |                 |          |                                                  |               |                 |          |
| <b>Mean (Sd)</b>                                     | 5.9 (8.2)                                        | -             | 5.9 (8.2)       | p = 0.75 | -                                                | -             | -               | p = NA   |
| <b>95% CI</b>                                        | [-68.1 ; 79.8]                                   | -             | [-68.1 ; 79.8]  |          | -                                                | -             | -               |          |
| <b>Min-Max</b>                                       | [0.0 ; 11.7]                                     | -             | [0.0 ; 11.7]    |          | -                                                | -             | -               |          |
| <b>Median</b>                                        | 5.9                                              | -             | 5.9             |          | -                                                | -             | -               |          |
| <b>Q1-Q3</b>                                         | [0.0 ; 11.7]                                     | -             | [0.0 ; 11.7]    |          | -                                                | -             | -               |          |
| <b>Total parenteral nutrition</b>                    |                                                  |               |                 |          |                                                  |               |                 |          |
| <b>No</b>                                            | 16 (32.7%)                                       | 19 (51.4%)    | 35 (40.7%)      | p = 0.08 | 7 (29.2%)                                        | 4 (25.0%)     | 11 (27.5%)      | p = 1.00 |
| <b>Yes</b>                                           | 33 (67.4%)                                       | 18 (48.7%)    | 51 (59.3%)      |          | 17 (70.8%)                                       | 12 (75.0%)    | 29 (72.5%)      |          |
| <b>Time to total parenteral nutrition (months)**</b> |                                                  |               |                 |          |                                                  |               |                 |          |
| <b>Mean (Sd)</b>                                     | 1.9 (3.0)                                        | 2.7 (3.6)     | 2.2 (3.2)       | p = 0.30 | 4.8 (4.7)                                        | 4.9 (6.3)     | 4.8 (5.3)       | p = 0.69 |
| <b>95% CI</b>                                        | [0.8 ; 2.9]                                      | [0.9 ; 4.5]   | [1.3 ; 3.1]     |          | [2.4 ; 7.2]                                      | [0.9 ; 8.9]   | [2.8 ; 6.8]     |          |
| <b>Min-Max</b>                                       | [0.0 ; 10.6]                                     | [0.0 ; 9.8]   | [0.0 ; 10.6]    |          | [0.0 ; 15.0]                                     | [0.0 ; 15.5]  | [0.0 ; 15.5]    |          |
| <b>Median</b>                                        | 0                                                | 0.6           | 0.1             |          | 3.2                                              | 0.4           | 2.7             |          |
| <b>Q1-Q3</b>                                         | [0.0 ; 2.7]                                      | [0.0 ; 5.0]   | [0.0 ; 4.1]     |          | [0.5 ; 6.3]                                      | [0.0 ; 9.7]   | [0.0 ; 9.5]     |          |
| <b>Enteral nutrition</b>                             |                                                  |               |                 |          |                                                  |               |                 |          |
| <b>No</b>                                            | 18 (36.7%)                                       | 13 (35.1%)    | 31 (36.1%)      | p = 0.88 | 9 (37.5%)                                        | 3 (18.8%)     | 12 (30.0%)      | p = 0.30 |
| <b>Yes</b>                                           | 31 (63.3%)                                       | 24 (64.9%)    | 55 (64.0%)      |          | 15 (62.5%)                                       | 13 (81.3%)    | 28 (70.0%)      |          |
| <b>Time to enteral nutrition (months)**</b>          |                                                  |               |                 |          |                                                  |               |                 |          |
| <b>Mean (Sd)</b>                                     | 0.6 (1.6)                                        | 0.4 (1.1)     | 0.5 (1.4)       | p = 0.41 | 1.9 (4.3)                                        | 4.0 (7.5)     | 2.9 (6.0)       | p = 0.83 |
| <b>95% CI</b>                                        | [0.0 ; 1.2]                                      | [-0.1 ; 0.9]  | [0.1 ; 0.9]     |          | [-0.5 ; 4.2]                                     | [-0.5 ; 8.6]  | [0.6 ; 5.2]     |          |

|                                          | At least 12 months of follow-up after index date |               |                 |          | At least 24 months of follow-up after index date |               |                 |          |
|------------------------------------------|--------------------------------------------------|---------------|-----------------|----------|--------------------------------------------------|---------------|-----------------|----------|
|                                          | IFX<br>(n=49)                                    | ADA<br>(n=37) | Total<br>(n=86) | p-value* | IFX<br>(n=24)                                    | ADA<br>(n=16) | Total<br>(n=40) | p-value* |
| <b>Min-Max</b>                           | [0.0 ; 8.7]                                      | [0.0 ; 5.2]   | [0.0 ; 8.7]     |          | [0.0 ; 15.0]                                     | [0.0 ; 21.4]  | [0.0 ; 21.4]    |          |
| <b>Median</b>                            | 0.1                                              | 0.1           | 0.1             |          | 0.1                                              | 0.1           | 0.1             |          |
| <b>Q1-Q3</b>                             | [0.0 ; 0.5]                                      | [0.0 ; 0.2]   | [0.0 ; 0.5]     |          | [0.0 ; 0.5]                                      | [0.0 ; 1.0]   | [0.0 ; 0.8]     |          |
| <b>Adverse events</b>                    |                                                  |               |                 |          |                                                  |               |                 |          |
| <b>No</b>                                | 15 (30.6%)                                       | 18 (48.7%)    | 33 (38.4%)      | 0.09     | 7 (29.2%)                                        | 4 (25.0%)     | 11 (27.5%)      | p = 1.00 |
| <b>Yes</b>                               | 34 (69.4%)                                       | 19 (51.4%)    | 53 (61.6%)      |          | 17 (70.8%)                                       | 12 (75.0%)    | 29 (72.5%)      |          |
| <b>Time to adverse events (months)**</b> |                                                  |               |                 |          |                                                  |               |                 |          |
| <b>Mean (Sd)</b>                         | 2.5 (2.7)                                        | 3.1 (3.2)     | 2.7 (2.9)       | 0.82     | 4.0 (5.4)                                        | 6.3 (7.8)     | 5.0 (6.5)       | p = 0.84 |
| <b>95% CI</b>                            | [1.5 ; 3.4]                                      | [1.5 ; 4.6]   | [1.9 ; 3.5]     |          | [1.2 ; 6.8]                                      | [1.4 ; 11.3]  | [2.5 ; 7.4]     |          |
| <b>Min-Max</b>                           | [0.1 ; 11.3]                                     | [0.1 ; 11.0]  | [0.1 ; 11.3]    |          | [0.1 ; 19.7]                                     | [0.1 ; 23.4]  | [0.1 ; 23.4]    |          |
| <b>Median</b>                            | 1.5                                              | 2.4           | 1.9             |          | 1.6                                              | 3.3           | 2.1             |          |
| <b>Q1-Q3</b>                             | [0.6 ; 2.9]                                      | [0.3 ; 5.6]   | [0.5 ; 3.8]     |          | [0.6 ; 4.9]                                      | [0.4 ; 10.2]  | [0.5 ; 6.9]     |          |

\* Continuous variables were compared using the student test or the Wilcoxon test, categorical variables were compared using the chi-square test or the Fisher's exact test \*\* only patients with at least 1 event; ADA= adalimumab; IFX=infliximab

**Table S 4: Patient clinical characteristics in the pre-index period (3 months before the index date)**

|                                                       | IFX<br>(n=80) | ADA<br>(n=53) | Total<br>(n=133) | p-value * |
|-------------------------------------------------------|---------------|---------------|------------------|-----------|
| <b>Hospitalisations, n (%)</b>                        | 44 ( 55.0%)   | 31 ( 58.5%)   | 75 ( 56.4%)      | p = 0.69  |
| <b>Length of hospitalizations (days), mean (SD)</b>   | 11.0 (6.3)    | 11.2 (6.1)    | 11.1 (6.2)       | p = 0.78  |
| <b>Surgical procedures, n (%)</b>                     | 14 ( 17.5%)   | 9 ( 17.0%)    | 23 ( 17.3%)      | p = 0.94  |
| <b>Complication (fistulas or obstructions) , n(%)</b> | 27 ( 33.8%)   | 17 ( 32.1%)   | 44 ( 33.1%)      | p = 0.84  |

\* Continuous variables were compared using the student test or the Wilcoxon test, categorical variables were compared using the chi-square test or the Fisher's exact test; ADA= adalimumab; IFX=infliximab

Figure S 2: Kaplan Meier plot of time to switch or discontinuation ADA or IFX group (base-case)

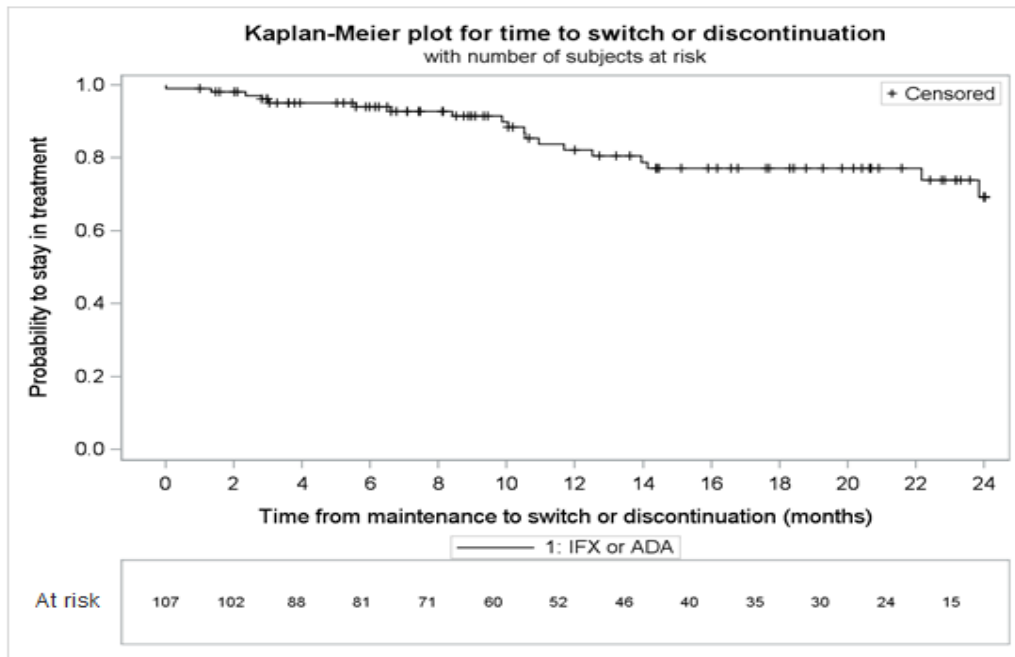

Figure S 3: Kaplan Meier plot of time to switch or discontinuation for Sensitivity Analysis (study time window -7days)

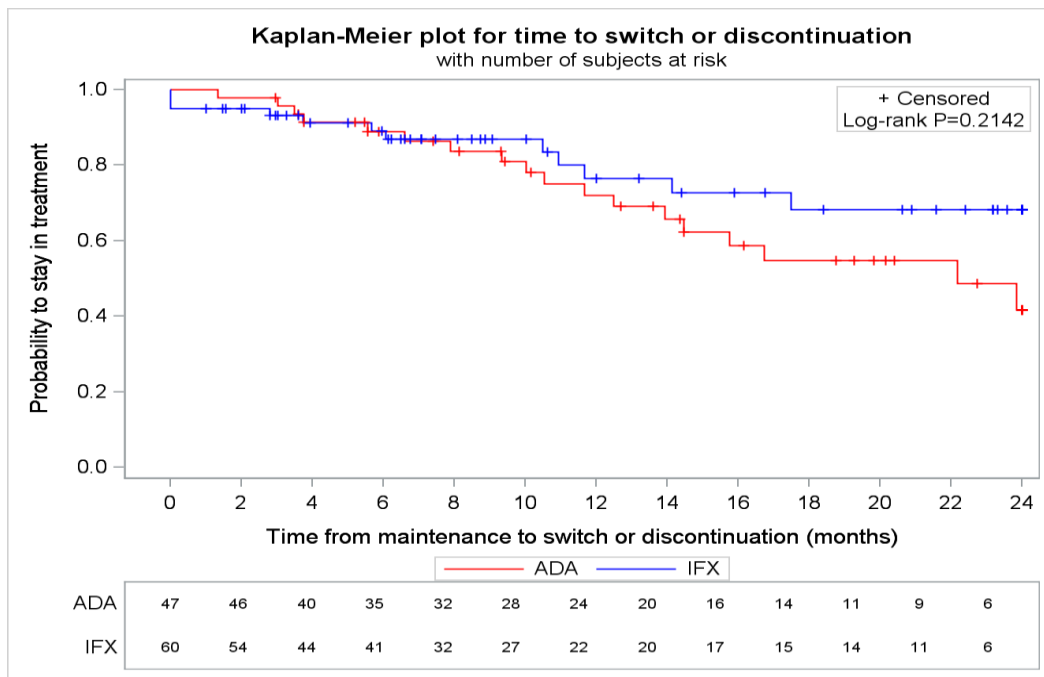

Figure S 4: Kaplan Meier plot of time to switch or discontinuation for sensitivity analysis (study time window +7days)

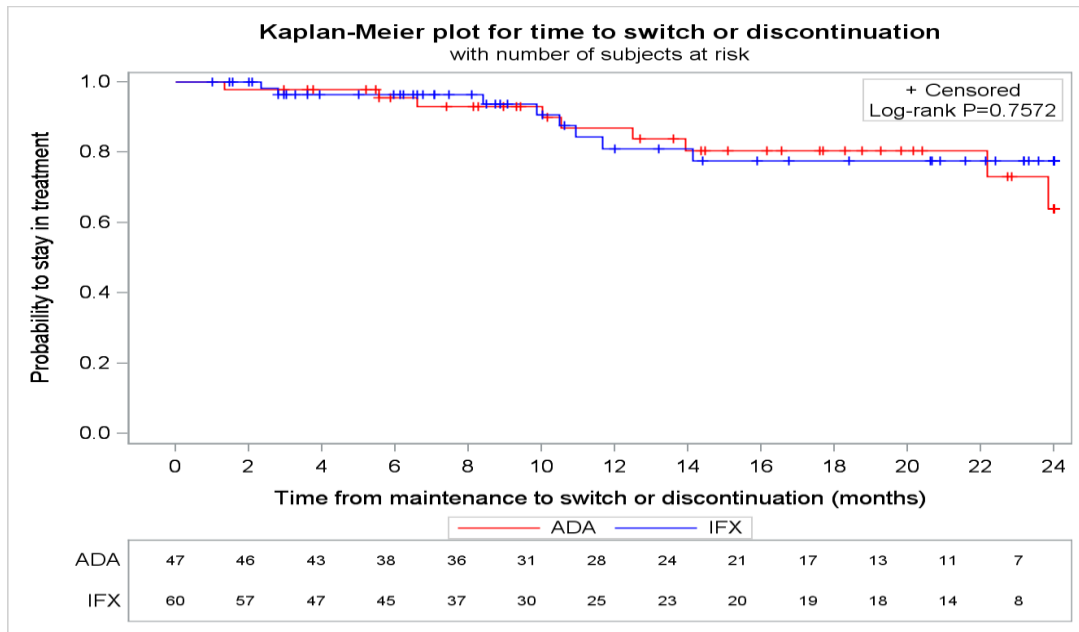

Figure S 5: Kaplan Meier plot of time to dose escalation (ADA)

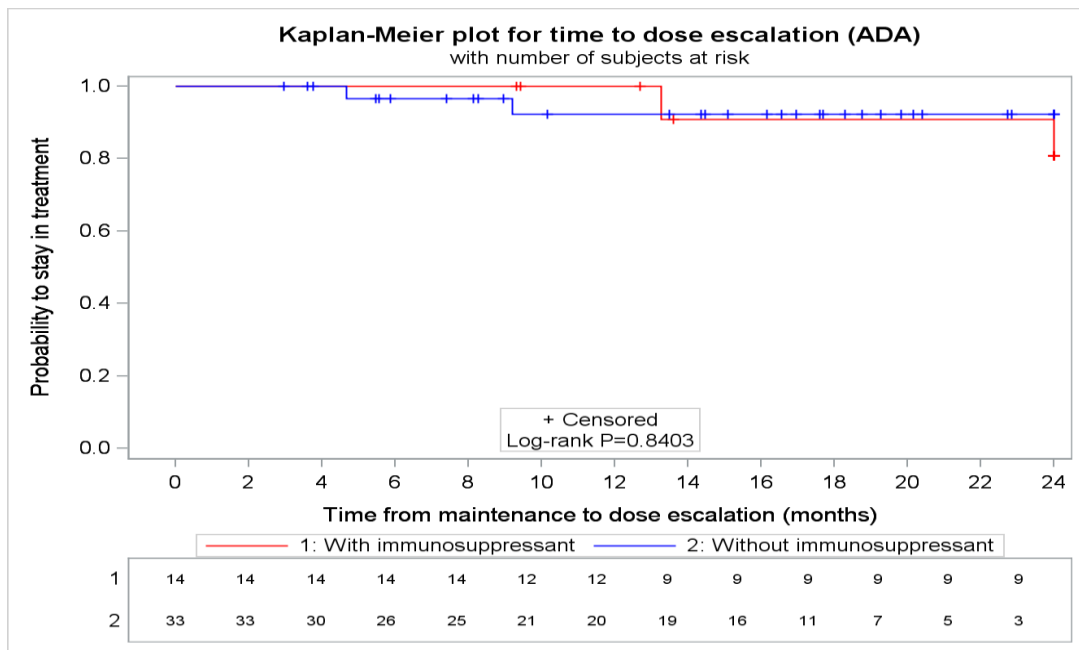

Figure S 6: Kaplan Meier plot of time to dose escalation (IFX)

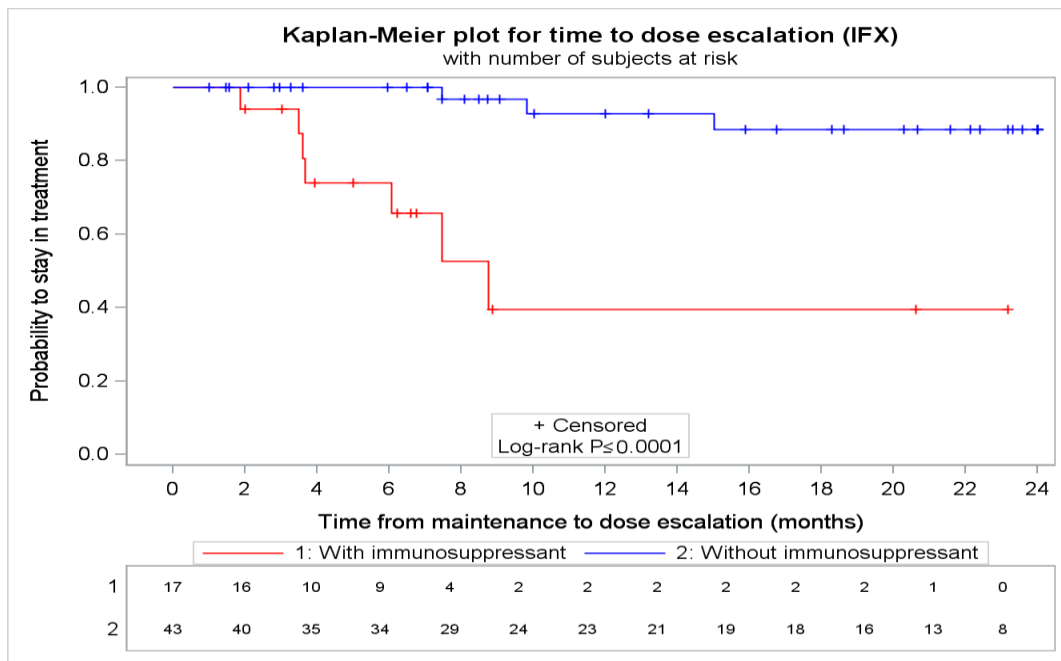

Figure S 7: Kaplan Meier plot of time to surgery

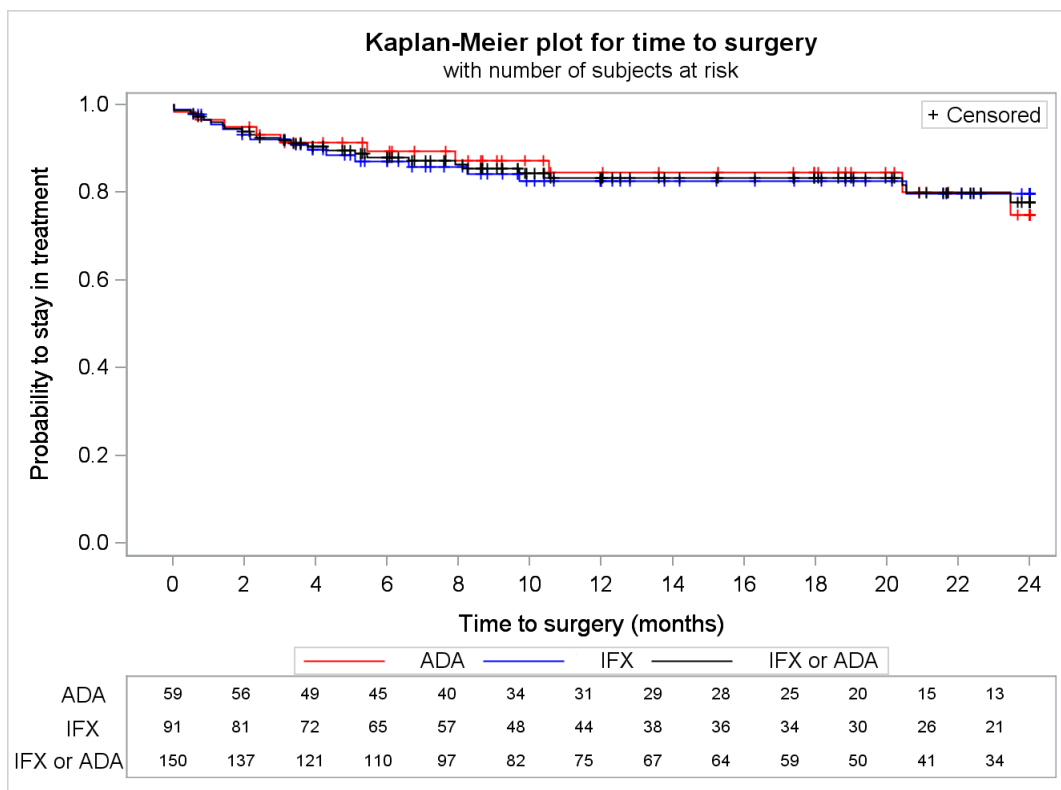

(Log-rank p-value of ADA vs. IFX =0.97)



Figure S 8: Kaplan Meier plot of time to leukocyte removal therapy

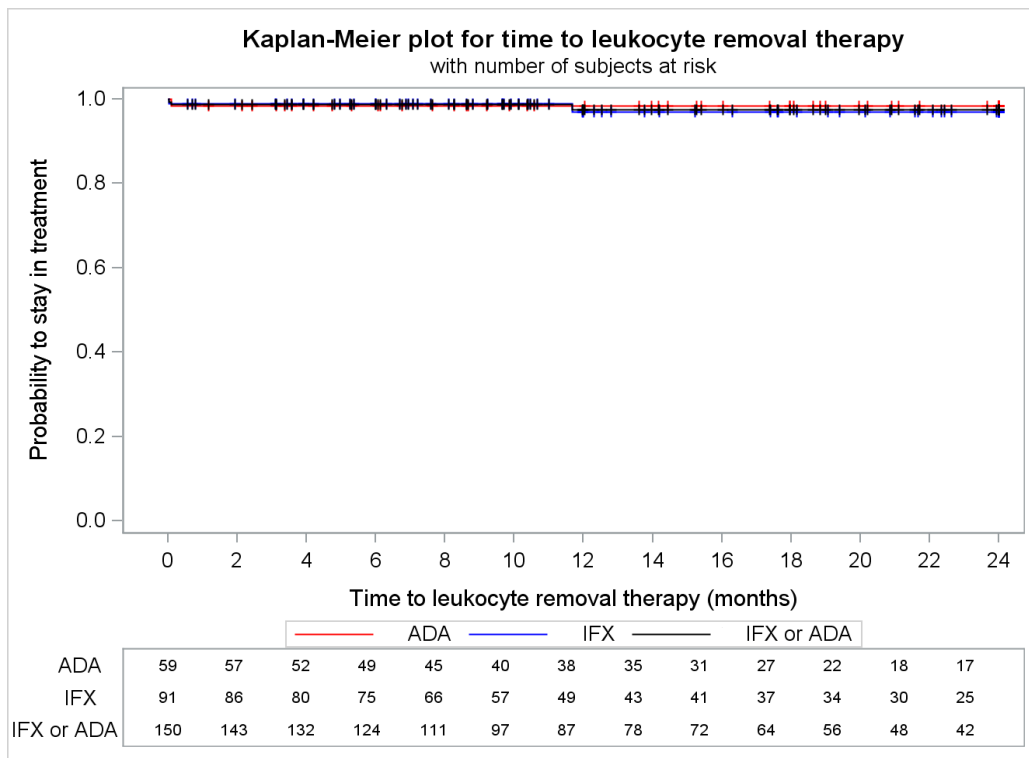

Figure S 9: Kaplan Meier plot of time to adverse events

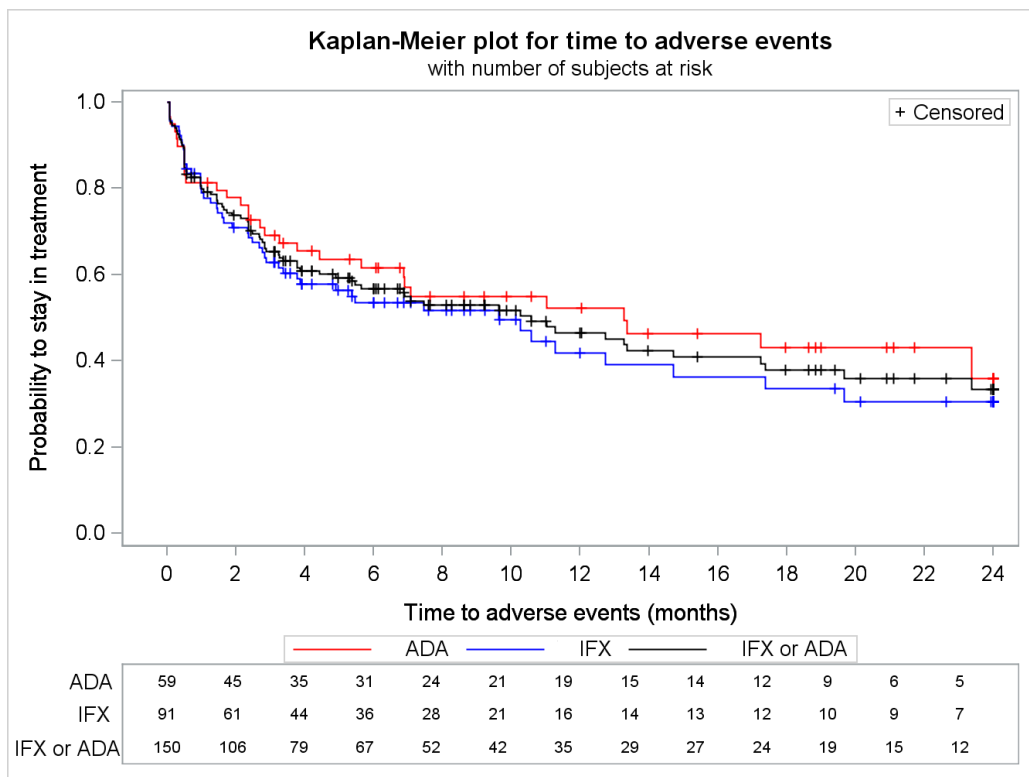

**Figure S 10: Missing ADA and IFX prescriptions dates' imputation algorithm:**

- If previous and following prescriptions dates were available, then:
  - If the midpoint between the previous and next prescription dates occurs during the month of the current prescription, then missing prescription date will be imputed by the midpoint of the dates
  - Else (i.e. the midpoint between the previous and following prescription does not correspond to the month of current prescription) the 15th of the month provided in the database will be used
- If the next prescription date only is available, then missing date will be calculated as the difference between next date and the interval defined in the package insert (56 days for IFX/ number of syringes prescribed \* 14 days for ADA)
  - but if the calculated month was different from the month provided in the database, then
    - if the next prescription is not in the same month as current prescription, then the 15th of the month provided in the database will be used
    - If the next prescription occurs in the same month as current prescription, then it will be assumed that the current prescription occurs on the first of the month
- If the previous prescription is only available, then missing date will be calculated as the sum of previous date and the interval defined in the package insert (56 days for IFX/ number of syringes prescribed \* 14 days for ADA)
  - but if the calculated month was different from the month provided in the database, then
    - if the previous prescription was not in the same month as current prescription, the 15th of the month provided in the database will be used
    - If the previous prescription occurs in the same month as current prescription, it will be assumed that current prescription occurs on the last day of the month
- If no date was available for the patient then the 15<sup>th</sup> of the month will be used.

**Table S 5: List of drug ATC codes**

|                        | ATC code          | Name                            |
|------------------------|-------------------|---------------------------------|
| Treatments of interest | L04AB04           | Adalimumab                      |
|                        | L04AB02           | Infliximab                      |
| Immunosuppressants     | L04AX01           | Azathioprine                    |
|                        | L01BB02           | Mercaptopurine                  |
|                        | L04AD01           | Ciclosporin                     |
|                        | L04AD02           | Tacrolimus                      |
|                        | L01BA01           | Methotrexate                    |
|                        | L04AX03           | Methotrexate (oral)             |
| Immunostimulants       | <b>L03</b>        | Immunostimulants                |
|                        | <b>J07AE02</b>    | Cholera vaccines                |
|                        | <b>J07AN01</b>    | Tuberculosis vaccines           |
|                        | <b>J07AP01</b>    | Typhoid vaccines                |
|                        | <b>J07BA03</b>    | Encephalitis vaccines           |
|                        | <b>J07BB03</b>    | Influenza vaccines              |
|                        | <b>J07BD</b>      | Measles vaccines                |
|                        | <b>J07BE01</b>    | Mumps vaccines                  |
|                        | <b>J07BF</b>      | Poliomyelitis vaccines          |
|                        | <b>J07BH</b>      | Rota virus diarrhea vaccines    |
|                        | <b>J07BJ</b>      | Rubella vaccines                |
|                        | <b>J07BK</b>      | Varicella zoster vaccines       |
|                        | <b>J07BL</b>      | Yellow fever vaccines           |
|                        | Enteral nutrition | <b>V06DB</b>                    |
| <b>V06DX</b>           |                   | Other combinations of nutrients |

**Table S 6: List of adverse events codes**

|                      | ICD-10 code               | Name                                                                                                |
|----------------------|---------------------------|-----------------------------------------------------------------------------------------------------|
| Infections           | A00-A09                   | Intestinal infectious diseases                                                                      |
|                      | A15-A19                   | Tuberculosis                                                                                        |
|                      | A20-A28                   | Certain zoonotic bacterial diseases                                                                 |
|                      | A30-A49                   | Other bacterial diseases                                                                            |
|                      | A50-A64                   | Infections with a predominantly sexual mode of transmission                                         |
|                      | A65-A69                   | Other spirochaetal diseases                                                                         |
|                      | A70-A74                   | Other diseases caused by chlamydiae                                                                 |
|                      | A75-A79                   | Rickettsioses                                                                                       |
|                      | A80-A89                   | Viral infections of the central nervous system                                                      |
|                      | A92-A99                   | Arthropod-borne viral fevers and viral haemorrhagic fevers                                          |
|                      | B00-B09                   | Viral infections characterized by skin and mucous membrane lesions                                  |
|                      | B15-B19                   | Viral hepatitis                                                                                     |
|                      | B20-B24                   | Human immunodeficiency virus [HIV] disease                                                          |
|                      | B25-B34                   | Other viral diseases                                                                                |
|                      | B35-B49                   | Mycoses                                                                                             |
|                      | B50-B64                   | Protozoal diseases                                                                                  |
|                      | B65-B83                   | Helminthiases                                                                                       |
|                      | B85-B89                   | Pediculosis, acariasis and other infestations                                                       |
|                      | B90-B94                   | Sequelae of infectious and parasitic diseases                                                       |
|                      | B95-B98                   | Bacterial, viral and other infectious agents                                                        |
| B99-B99              | Other infectious diseases |                                                                                                     |
| Other adverse events | C00-D48                   | Neoplasms                                                                                           |
|                      | D50-D89                   | Diseases of the blood and blood-forming organs and certain disorders involving the immune mechanism |
|                      | E00-E90                   | Endocrine, nutritional and metabolic diseases                                                       |
|                      | J00-J99                   | Diseases of the respiratory system                                                                  |
|                      | K00-K93                   | Diseases of the digestive system                                                                    |
|                      | L00-L99                   | Diseases of the skin and subcutaneous tissue                                                        |
|                      | M00-M99                   | Diseases of the musculoskeletal system and connective tissue                                        |
|                      | N00-N99                   | Diseases of the genitourinary system                                                                |
|                      | R00-R99                   | Symptoms, signs and abnormal clinical and laboratory findings                                       |
|                      | S00-T98                   | Injury, poisoning                                                                                   |

**Table S 7: List of surgery codes**

| Procedure ID | Procedure name                                                                              | 診療行為名                            |
|--------------|---------------------------------------------------------------------------------------------|----------------------------------|
| 150160110    | surgery for regional peritoneal cancer (subphrenic abscess)                                 | 限局性腹腔膿瘍手術（横隔膜下膿瘍）                |
| 150160210    | surgery for regional peritoneal cancer (Douglas' abscess)                                   | 限局性腹腔膿瘍手術（ダグラス窩膿瘍）               |
| 150160310    | surgery for regional peritoneal cancer (periappendiceal abscess)                            | 限局性腹腔膿瘍手術（虫垂周囲膿瘍）                |
| 150160410    | surgery for regional peritoneal cancer (other)                                              | 限局性腹腔膿瘍手術（その他）                   |
| 150160610    | incision and drainage of pelvic retroperitoneal abscess                                     | 骨盤腹膜外膿瘍切開排膿術                     |
| 150160810    | surgery for acute generalized peritonitis                                                   | 急性汎発性腹膜炎手術                       |
| 150164850    | endoscopic gastrointestinal bleeding                                                        | 内視鏡的消化管止血術                       |
| 150171610    | gastrostomy (including percutaneous endoscopic gastrostomy and/or laparoscopic gastrostomy) | 胃瘻造設術（経皮的内視鏡下胃瘻造設術、腹腔鏡下胃瘻造設術を含む） |
| 150172110    | cholangiotomy                                                                               | 胆管切開術                            |
| 150172210    | cholecystolithotomy                                                                         | 胆嚢切開結石摘出術                        |
| 150296610    | cholangiolithotomy (including cholecystectomy)                                              | 胆管切開結石摘出術（胆嚢摘出を含む）               |
| 150172310    | cholangiolithotomy (excluding cholecystectomy)                                              | 胆管切開結石摘出術（胆嚢摘出を含まない）             |
| 150276810    | laparoscopic cholangiolithotomy (including cholecystectomy)                                 | 腹腔鏡下胆管切開結石摘出術（胆嚢摘出を含む）           |
| 150276910    | laparoscopic cholangiolithotomy (excluding cholecystectomy)                                 | 腹腔鏡下胆管切開結石摘出術（胆嚢摘出を含まない）         |
| 150172410    | cholecystectomy                                                                             | 胆嚢摘出術                            |
| 150254110    | laparoscopic cholecystectomy                                                                | 腹腔鏡下胆嚢摘出術                        |
| 150174110    | external cholecystostomy                                                                    | 胆嚢外瘻造設術                          |
| 150174210    | external cholecystostomy (laparotomy)                                                       | 胆管外瘻造設術（開腹）                      |
| 150174310    | external cholecystostomy (percutaneous transhepatic)                                        | 胆管外瘻造設術（経皮経肝）                    |
| 150174550    | percutaneous transhepatic cholangiodrainage                                                 | 経皮的胆管ドレナージ術                      |
| 150174910    | endoscopic bile duct stone removal (with choledochotomy)                                    | 内視鏡的胆道結石除去術（胆道碎石術を伴うもの）          |

| Procedure ID | Procedure name                                                                                          | 診療行為名                           |
|--------------|---------------------------------------------------------------------------------------------------------|---------------------------------|
| 150362510    | endoscopic bile duct stone removal (other)                                                              | 内視鏡的胆道結石除去術（その他）                |
| 150175310    | endoscopic biliary dilatation                                                                           | 内視鏡的胆道拡張術                       |
| 150341450    | endoscopic papillary dilatation                                                                         | 内視鏡的乳頭拡張術                       |
| 150175410    | endoscopic papillary dilatation (sphincterotomy only)                                                   | 内視鏡的乳頭切開術（乳頭括約筋切開のみ）            |
| 150296710    | endoscopic papillary dilatation (with cholelithotripsy)                                                 | 内視鏡的乳頭切開術（胆道碎石術を伴う）             |
| 150254410    | endoscopic biliary stenting                                                                             | 内視鏡的胆道ステント留置術                   |
| 150263810    | endoscopic biliary stent placement                                                                      | 経皮経肝胆管ステント挿入術                   |
| 150180010    | suture of ruptured intestine                                                                            | 破裂腸管縫合術                         |
| 150180110    | enterotomy                                                                                              | 腸切開術                            |
| 150180210    | surgery for intestinal adhesion                                                                         | 腸管癒着症手術                         |
| 150180350    | surgery of ileus (surgery for intestinal adhesion)                                                      | 腸閉塞症手術（腸管癒着症手術）                 |
| 150271550    | laparoscopic intestinal adhesiolysis                                                                    | 腹腔鏡下腸管癒着剥離術                     |
| 150271950    | laparoscopic small bowel resection (resection except surgery for malignancy)                            | 腹腔鏡下小腸切除術（悪性腫瘍手術以外の切除術）         |
| 150363710    | laparoscopic small bowel resection (surgery for malignancy)                                             | 腹腔鏡下小腸切除術（悪性腫瘍手術）               |
| 150181310    | extirpation of tumor and/or diverticulum of small bowel (including surgery for Meckel's diverticulitis) | 小腸腫瘍、小腸憩室摘出術（メッケル憩室炎手術を含む）      |
| 150180750    | surgery of ileus (colectomy) (resection of the small part)                                              | 腸閉塞症手術（結腸切除術）（小範囲切除）            |
| 150180850    | surgery of ileus (colectomy) (hemicolectomy)                                                            | 腸閉塞症手術（結腸切除術）（結腸半側切除）           |
| 150180950    | surgery of ileus (colectomy) (resection of total or most parts, or surgery for malignancy)              | 腸閉塞症手術（結腸切除術）（全切除、亜全切除又は悪性腫瘍手術） |
| 150181710    | colectomy (resection of the small part)                                                                 | 結腸切除術（小範囲切除）                    |
| 150181810    | colectomy (hemicolectomy)                                                                               | 結腸切除術（結腸半側切除）                   |
| 150181910    | colectomy (resection of total or most parts, or surgery for malignancy)                                 | 結腸切除術（全切除、亜全切除又は悪性腫瘍手術）         |
| 150277810    | laparoscopic colectomy (resection of the small part, hemicolectomy)                                     | 腹腔鏡下結腸切除術（小範囲切除、結腸半側切除）         |

| Procedure ID | Procedure name                                                                                        | 診療行為名                           |
|--------------|-------------------------------------------------------------------------------------------------------|---------------------------------|
| 150337710    | laparoscopic colectomy (resection of total or most parts)                                             | 腹腔鏡下結腸切除術（全切除、垂全切除）             |
| 150324910    | laparoscopic colectomy for cancer                                                                     | 腹腔鏡下結腸悪性腫瘍切除術                   |
| 150183110    | extirpation of colon tumor (including extirpation of ileocecal tumor)                                 | 結腸腫瘍摘出術（回盲部腫瘍摘出術を含む）            |
| 150285010    | endoscopic colon polyp/mucous membrane removal (< 2 cm in diameter)                                   | 内視鏡的結腸ポリープ・粘膜切除術（長径 2 cm未満）     |
| 150183410    | endoscopic colon polyp/mucous membrane removal (>= 2 cm in diameter)                                  | 内視鏡的結腸ポリープ・粘膜切除術（長径 2 cm以上）     |
| 150263950    | endoscopic hemostasis of small bowel and colon                                                        | 小腸結腸内視鏡的止血術                     |
| 150184110    | enteroenterostomy                                                                                     | 腸吻合術                            |
| 150184310    | enterostomy                                                                                           | 腸瘻造設術                           |
| 150184510    | Colostomy                                                                                             | 人工肛門造設術                         |
| 150184710    | incision and suture of enterostenosis                                                                 | 腸狭窄部切開縫合術                       |
| 150185610    | colostomy closure (without intestinal resection)                                                      | 人工肛門閉鎖術（腸管切除を伴わない）              |
| 150293310    | stenosis dilatation of small bowel and colon                                                          | 小腸・結腸狭窄部拡張術（内視鏡）                |
| 150186510    | incision for perirectal abscess                                                                       | 直腸周囲膿瘍切開術                       |
| 150187010    | extirpation of rectal cancer (transperitoneal and transanal)                                          | 直腸腫瘍摘出術（経腹及び経肛）                 |
| 150186910    | extirpation of rectal cancer (sphincteric)                                                            | 直腸腫瘍摘出術（経括約筋）                   |
| 150187110    | rectal resection/amputation (resection)                                                               | 直腸切除・切断術（切除術）                   |
| 150245410    | rectal resection/amputation (low anterior resection)                                                  | 直腸切除・切断術（低位前方切除術）               |
| 150297510    | rectal resection/amputation (super-low anterior resection) (transanal colonic pouch-anal anastomosis) | 直腸切除・切断術（超低位前方切除術）（経肛門的結腸嚢肛門吻合） |
| 150187210    | rectal resection/amputation (amputation)                                                              | 直腸切除・切断術（切断術）                   |
| 150325210    | laparoscopic rectal resection/amputation (resection)                                                  | 腹腔鏡下直腸切除・切断術（切除術）               |
| 150337810    | laparoscopic rectal resection/amputation (low anterior resection)                                     | 腹腔鏡下直腸切除・切断術（低位前方切除術）           |
| 150337910    | laparoscopic rectal resection/amputation                                                              | 腹腔鏡下直腸切除・切断術（切断術）               |

| Procedure ID | Procedure name                                                                            | 診療行為名                     |
|--------------|-------------------------------------------------------------------------------------------|---------------------------|
|              | (amputation)                                                                              |                           |
| 150187510    | proctoplasty for stenosis                                                                 | 直腸狭窄形成手術                  |
| 150189350    | Milligan-Morgan haemorrhoidectomy                                                         | ミリガン・モーガン手術               |
| 150189450    | Whitehead's operation                                                                     | ホワイトヘッド手術                 |
| 150341650    | hemorrhoid surgery (use of automatic anastomotic devices)                                 | 痔核手術（自動吻合器使用）             |
| 150188210    | hemorrhoid surgery (including anal prolapse) (sclerotherapy)                              | 痔核手術（脱肛を含む）（硬化療法）         |
| 150325410    | hemorrhoid surgery (including anal prolapse) (sclerotherapy (four-step injection method)) | 痔核手術（脱肛を含む）（硬化療法（四段階注射法）） |
| 150188310    | hemorrhoid surgery (including anal prolapse) (open hemorrhoidectomy)                      | 痔核手術（脱肛を含む）（結紮術）          |
| 150188410    | hemorrhoid surgery (including anal prolapse) (cauterization)                              | 痔核手術（脱肛を含む）（焼灼術）          |
| 150188510    | hemorrhoid surgery (including anal prolapse) (thrombectomy)                               | 痔核手術（脱肛を含む）（血栓摘出術）        |
| 150188610    | hemorrhoid surgery (including anal prolapse) (radical surgery)                            | 痔核手術（脱肛を含む）（根治手術）         |
| 150338010    | hemorrhoid surgery (PPH)                                                                  | 痔核手術（PPH）                 |
| 150188750    | incision of anal sphincter                                                                | 肛門括約筋切開術                  |
| 150189610    | radical surgery for anal fissure                                                          | 裂肛根治手術                    |
| 150189810    | incision of perirectal abscess                                                            | 肛門周囲膿瘍切開術                 |
| 150189910    | radical surgery for anal fistula (simple)                                                 | 痔瘻根治手術（単純）                |
| 150190010    | radical surgery for anal fistula (complicated)                                            | 痔瘻根治手術（複雑）                |
| 150190150    | surgery for high rectal fistula                                                           | 高位直腸瘻手術                   |
| 150190310    | anal polypectomy                                                                          | 肛門ポリープ切除術                 |
| 150190710    | surgery for anal cancer (resection)                                                       | 肛門悪性腫瘍手術（切除）              |
| 150264010    | surgery for anal cancer (with rectal amputation)                                          | 肛門悪性腫瘍手術（直腸切断を伴うもの）       |
| 150190910    | anal dilatation (invasive)                                                                | 肛門拡張術（観血的）                |
| 150191010    | anal sphincteroplasty (scartectomy)                                                       | 肛門括約筋形成手術（瘢痕切除）           |
